# Supplementary material
Source: PubMed Central journal article supplement (PMC4363948)
Supplement: s12918-014-0097-z-S1.pdf [file s12918-014-0097-z-S1.pdf]

## Training set design and description

As far as the design of the training set is concerned, we hereby address two important points. First is the issue of why we augment the negative training set with deliberately frame-shifted fusions. The second regards the issue of whether we can quantify the importance of the “in-frame” feature given that we have altered the training set composition.

Regarding the first issue, we began our study by partitioning all the available data into positive training data from ChimerDB2.0 (POS), negative training data from reactive lymph node tissue (NEG), and a small validation set of transcripts not encountered during classifier training. At this early stage we had not yet augmented the negative training examples with a set of deliberately frame-shifted ChimerDB2.0 transcripts (NEGFS). We were concerned with the performance of Pegasus when trained with only POS and NEG. Scoring of the 39 non-oncogenic transcripts from the validation set can be seen in the fourth columns in the boxplots below, and we have also tabulated them for easy reference. Discriminating POS vs. NEG ignored the scenario where the 3’ sequence has maintained important functional domains but they are out of frame. This scenario is biologically plausible and indeed is observed in the **bolded** rows of the table. The 3’ gene contains domains with oncogenic potential, but they are out of frame. After re-training the classifier, though, using an augmented negative training set of NEG+NEGFS we can clearly see the improvement in specificity.

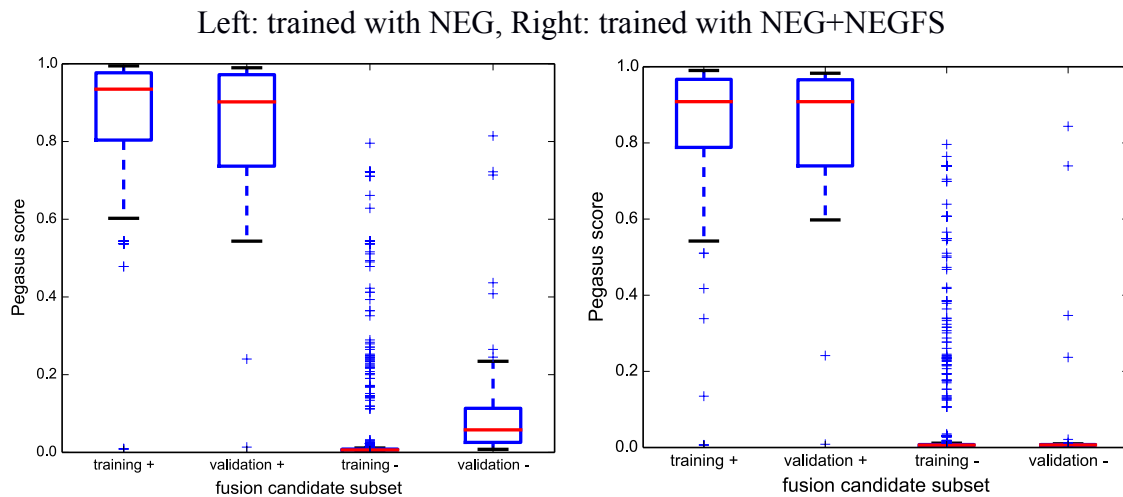

Table of 39 non-oncogenic transcripts from validation set

| Gene Name1 | Gene Name2  | Reading Frame     | DriverScore (NEG)  | DriverScore (NEG+NEGFS) |
|------------|-------------|-------------------|--------------------|-------------------------|
| PTCRA      | CNPY3       | InFrame           | 0.828078171        | 0.840731419             |
| HSPE1      | MOBKL3      | InFrame           | 0.720768052        | 0.739180545             |
| HMGCS1     | <b>LCK</b>  | <b>FrameShift</b> | <b>0.616223438</b> | <b>0.006046606</b>      |
| KDSR       | STAT6       | InFrame           | 0.337369454        | 0.294550384             |
| KLHL24     | <b>TNK2</b> | <b>FrameShift</b> | <b>0.321294446</b> | <b>0.005866983</b>      |

|          |              |                   |                    |                    |
|----------|--------------|-------------------|--------------------|--------------------|
| CDK11A   | <b>PTPRS</b> | <b>FrameShift</b> | <b>0.315252193</b> | <b>0.005641046</b> |
| UNC45B   | <b>DLG2</b>  | <b>FrameShift</b> | <b>0.3060631</b>   | <b>0.01055812</b>  |
| HLA-DRB1 | <b>AKT3</b>  | <b>FrameShift</b> | <b>0.247467869</b> | <b>0.005169276</b> |
| CKLF     | CKLFSF1      | InFrame           | 0.244274047        | 0.229173079        |
| PPP2R1B  | SIK2         | FrameShift        | 0.180824126        | 0.007822775        |
| EPN2     | MAPK7        | FrameShift        | 0.164994389        | 0.010663401        |
| MKRN2    | RAF1         | FrameShift        | 0.1449181          | 0.00663566         |
| L2HGDH   | TAF1         | FrameShift        | 0.144017721        | 0.00723047         |
| STX16    | RPS6KB1      | FrameShift        | 0.135060143        | 0.006046606        |
| ACSL6    | CAMK4        | FrameShift        | 0.135060143        | 0.006046606        |
| MGRN1    | CSNK1A1      | FrameShift        | 0.135060143        | 0.006046606        |
| ITSN1    | PIM2         | FrameShift        | 0.135060143        | 0.006046606        |
| LIMD2    | MAP3K3       | FrameShift        | 0.101303656        | 0.00663566         |
| EEF1A1   | PAN3         | FrameShift        | 0.096906335        | 0.00663566         |
| SFRS8    | ULK1         | FrameShift        | 0.089613688        | 0.007933935        |
| PTGIS    | PRKCQ        | FrameShift        | 0.0850081          | 0.007933935        |
| PPIL3    | CLK1         | FrameShift        | 0.0850081          | 0.007933935        |
| OAZ1     | GAK          | FrameShift        | 0.0850081          | 0.007933935        |
| OAZ1     | CSNK1G2      | FrameShift        | 0.0850081          | 0.007933935        |
| IL12RB1  | MAST3        | FrameShift        | 0.079465309        | 0.005383732        |
| TMED5    | NEK9         | FrameShift        | 0.077757011        | 0.009479786        |
| TLN1     | GRK4         | FrameShift        | 0.070029196        | 0.001644421        |
| PIK3IP1  | LIMK2        | FrameShift        | 0.056493145        | 0.006395999        |
| KLHL22   | SCARF2       | FrameShift        | 0.045875245        | 0.013841911        |
| AMDHD2   | PDPK1        | FrameShift        | 0.043102962        | 0.015918359        |
| PTBP1    | DDX5         | FrameShift        | 0.029069924        | 0.009069422        |
| ANP32A   | PKM2         | FrameShift        | 0.027411948        | 0.008605665        |
| NCOR2    | CDK2AP1      | FrameShift        | 0.021583033        | 0.008715146        |
| NOTCH2NL | NOTCH2       | FrameShift        | 0.019193874        | 0.006939551        |
| PIGL     | JAK3         | FrameShift        | 0.010442874        | 0.006307432        |
| HBS1L    | STAT3        | FrameShift        | 0.009569203        | 0.005747346        |
| STAT5B   | STAT5A       | FrameShift        | 0.008533391        | 0.006307432        |

Regarding the second issue, a precise quantification of the “in-frame” feature importance may be clouded by our deliberate introduction of NEGFS to the training data. Below we show a side-by-side comparison of the feature rankings when trained using POS vs. NEG [left] and POS vs. (NEG+NEGFS) [right]:

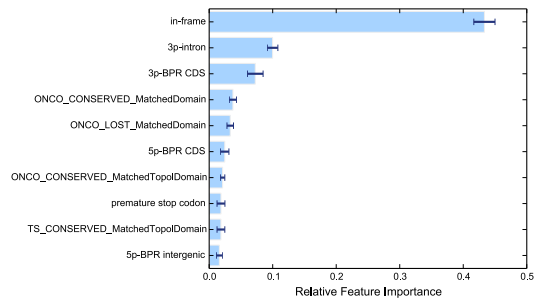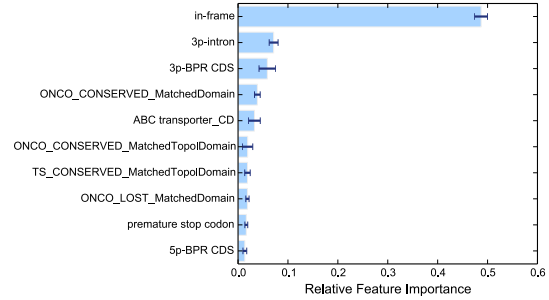

The “in-frame” feature does increase slightly in its importance score, but the overall distribution of feature importances is largely unchanged. The ChimerDB2.0 database contains largely in-frame fusions, so it comes as no surprise that this feature would be highly discriminative.

In summary, there is no evidence that the inclusion of NEGFS in the training data significantly changes the relative contributions of the features to the classification function. On the other hand, training with NEGFS *does* provide superior specificity on held out validation data and directly addresses a very real source of false positives.
