# Supplementary material
Source: PubMed Central journal article supplement (PMC4363948)

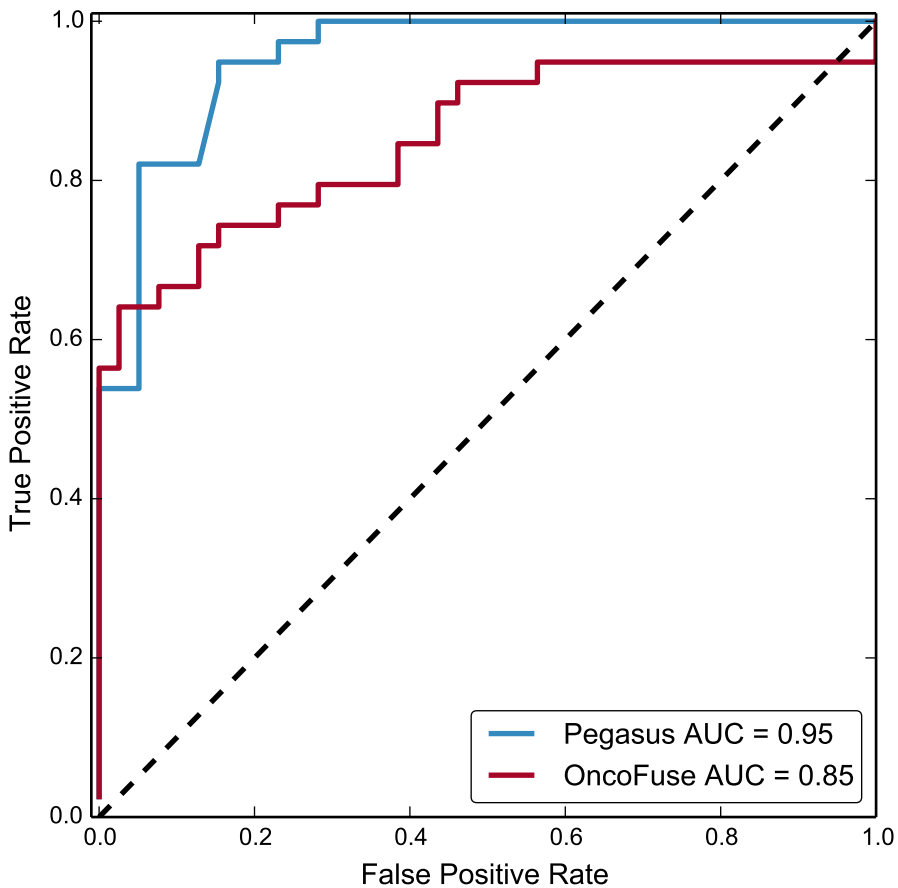

Supplement: s12918-014-0097-z-S2.pdf [file s12918-014-0097-z-S2.pdf]
